# Supplementary material for: Biocompatible nanocarriers for passive transdermal delivery of insulin based on self-adjusting N-alkylamidated carboxymethyl cellulose polysaccharides
Source: Royal Society of Chemistry journal article supplement (doi:10.1039/d2na00005a), 2022-01-01
Supplement: d2na00005a1.pdf [file d2na00005a1.pdf]

**-Supporting information-**

**Biocompatible nanocarriers for passive transdermal delivery of insulin based on  
self-adjusting *N*-alkylamidated carboxymethyl cellulose polysaccharides**

Yael Cohen,<sup>b,a</sup> Guy Cohen,<sup>c,d</sup> Dmitry Tworowski,<sup>e</sup> Noy Eretz-Kdosha,<sup>c</sup> Eldad Silberstein,<sup>f</sup> Elazar Fallik,<sup>a</sup>  
and Elena Poverenov<sup>\*a</sup>

<sup>a</sup> Agro-Nanotechnology and Advanced Materials Center, Institute of Postharvest and Food Sciences, Agriculture  
Research Organization, The Volcani Center, Rishon LeZion 7505101, Israel

<sup>b</sup> Institute of Biochemistry, Food Science and Nutrition, Faculty of Agriculture, Food and Environment, The Hebrew  
University of Jerusalem, Rehovot 76100, Israel

<sup>c</sup> The Skin Research Institute, Dead Sea & Arava Science Center, Masada 86910, Israel

<sup>d</sup> Eilat Campus, Ben-Gurion University of the Negev, Eilat 8855630, Israel

<sup>e</sup> Department of Structural Biology, Weizmann Institute of Science, 76100 Rehovot, Israel.

<sup>f</sup> Department of Plastic Surgery, Soroka University Medical Center, Ben-Gurion University of the Negev, Beer-Sheva,  
Israel.

\*Corresponding author: E-mail: [elenap@volcani.agri.gov.il](mailto:elenap@volcani.agri.gov.il). Phone: 972-39683354.

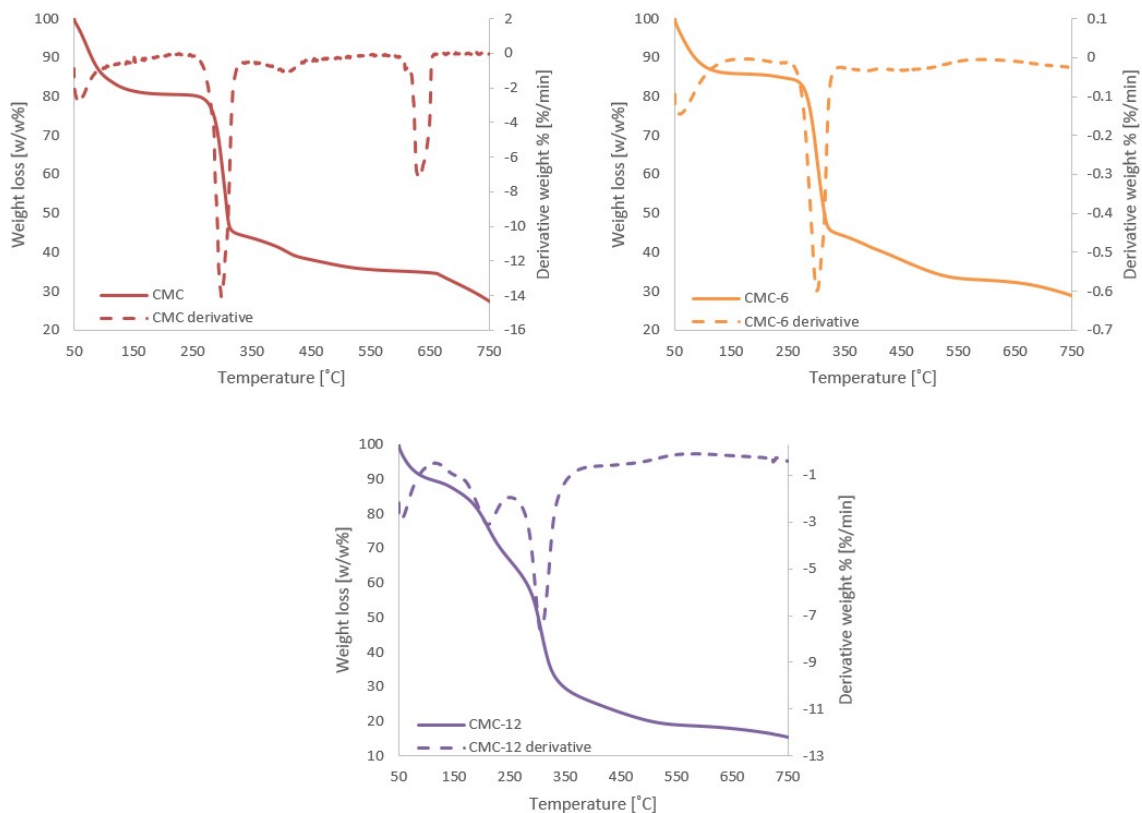

Figure S1 TGA derivatives for the prepared CMC and *N*-alkylamidated CMC-6 and CMC-12.

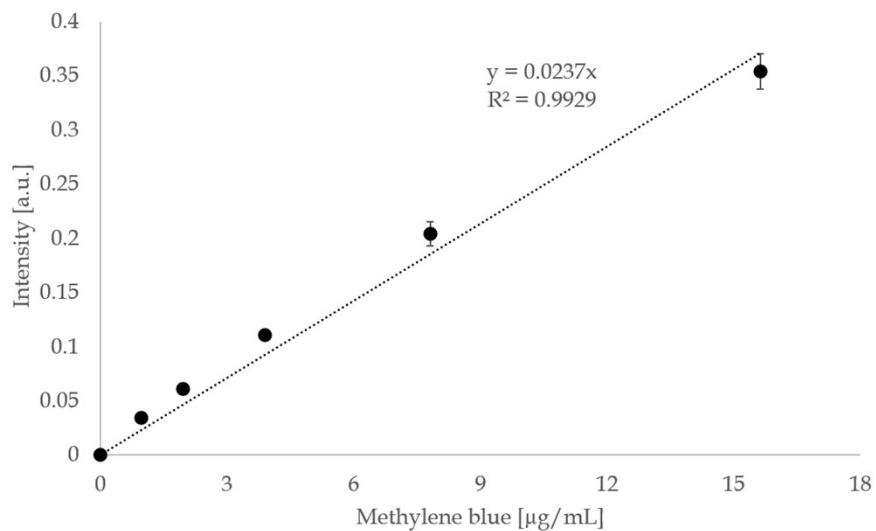

Figure S2 Calibration curve of methylene blue.

**Table S1** Immunoassay method validation analyses at three concentrations [1].

Low:

Medium:

| Mean value | Repeatability  |                  | Intermediate precision |                   |
|------------|----------------|------------------|------------------------|-------------------|
|            | S <sub>r</sub> | %CV <sub>r</sub> | S <sub>Rw</sub>        | %CV <sub>rw</sub> |
| 0.10       | 0.01           | 9.1              | 0.0                    | 18.6              |

| Mean value | Repeatability  |                  | Intermediate precision |                   |
|------------|----------------|------------------|------------------------|-------------------|
|            | S <sub>r</sub> | %CV <sub>r</sub> | S <sub>Rw</sub>        | %CV <sub>rw</sub> |
| 0.5        | 0.0            | 4.8              | 0.1                    | 12.7              |

High

| Mean value | Repeatability  |                  | Intermediate precision |                   |
|------------|----------------|------------------|------------------------|-------------------|
|            | S <sub>r</sub> | %CV <sub>r</sub> | S <sub>Rw</sub>        | %CV <sub>rw</sub> |
| 1.3        | 0.1            | 5.1              | 0.2                    | 13.3              |

## Reference

1. Andreasson, U.; Perret-Liaudet, A.; Doorn, L.J.C. van W. van; Blennow, K.; Chiasserini, D.; Engelborghs, S.; Fladby, T.; Genc, S.; Kruse, N.; Kuiperij, H.B.; et al. A Practical Guide to Immunoassay Method Validation. *Front. Neurol.* **2015**, *6*, 179, doi:10.3389/FNEUR.2015.00179.
